# Supplementary material for: Biocompatible Platinum Nanoclusters Prepared Using Bitter Gourd Polysaccharide for Colorimetric Detection of Ascorbic Acid
Source: MDPI journal article supplement (doi:10.3390/biom11050647), 2021-04-28
Supplement: s1 [file s1]

# Supporting information

## Biocompatible platinum nanoclusters prepared using bitter gourd polysaccharide for colorimetric detection of ascorbic acid

Kai Liu<sup>1</sup>, Yu Zhao<sup>1</sup>, Lu Zhang<sup>1</sup>, Mengmeng He<sup>1</sup>, Weifeng Lin<sup>2</sup>, Haotian Sun<sup>3</sup>, Zhiwei Liu<sup>1</sup>, Jie Hu<sup>1</sup>, Longgang Wang<sup>1\*</sup>

*1 State Key Laboratory of Metastable Materials Science and Technology, Key Laboratory of Applied Chemistry, Hebei Key Laboratory of heavy metal deep-remediation in water and resource reuse, Yanshan University, Qinhuangdao, 066004, China.*

*2 Department of Materials and Interfaces, Weizmann Institute of Science, Rehovot 76100, Israel*

*3 Ocean NanoTech, LLC, San Diego, CA 92126, USA*

### **1 Peroxidase-like activity assay of Pt-BGP NCs**

The peroxidase activity of Pt-BGP NCs was determined by detecting the amount of TMB oxidized to oxTMB. Three sets of experiments were designed to study the catalytic activity of Pt-BGP NCs: (i) TMB+Pt-BGP NCs; (ii) TMB+H<sub>2</sub>O<sub>2</sub>; (iii) TMB+Pt-BGP NCs+ H<sub>2</sub>O<sub>2</sub>. In the last set of experiments, 800  $\mu$ L of TMB (0.6 mM), 200  $\mu$ L of Pt-BGP NCs ( $C_{Pt}$ =0.66 mM) and 100  $\mu$ L of H<sub>2</sub>O<sub>2</sub> (0.3 M) were added to a 2ml PE tube and reacted at 30°C for 5 min. Then the absorbance was measured with a UV-Vis photometer. The experiment steps of the other groups were similar.

The effect of pH on the catalytic activity of Pt-BGP NCs was studied. 800  $\mu$ L of TMB (0.6 mM) in different pH buffer solutions (pH=1-12), 200  $\mu$ L of Pt-BGP NCs ( $C_{Pt}$  = 0.66 mM) and 300  $\mu$ L of buffer solution were mixed in a 2ml PE tube at 30°C for 5 min. 100  $\mu$ L H<sub>2</sub>O<sub>2</sub> (0.3 M) was mixed in the above solution at 30°C for 5 min, and finally the absorbance was measured at 652 nm by UV-Vis spectroscopy. The reaction process affected by temperature is similar to the above process. The pH value of the solution is fixed at pH=4, and the temperature is 20 to 80°C.

The catalytic kinetics of Pt-BGP NCs was Studied. Catalytic kinetics of TMB: 200  $\mu$ L of Pt-BGP NCs ( $C_{Pt}$  = 0.66 mM) and 200-1000  $\mu$ L TMB (pH=4, 0.6 mM) were mixed at 30°C for 5 min, and then

100  $\mu\text{L}$   $\text{H}_2\text{O}_2$  (0.3 M) was mixed in above solution. Finally, UV-Vis spectroscopy was used to record the absorbance of the experimental sample at 652 nm. The catalytic kinetics of  $\text{H}_2\text{O}_2$  was measured by changing the concentration of  $\text{H}_2\text{O}_2$ . The other steps are similar to the catalytic kinetics of TMB. The parameters  $K_m$  and  $V_{\max}$  were figure out by calculation of the Michaelis-Menten equation (1).

$$V = V_{\max} \frac{[S]}{K_m + [S]} \quad (1)$$

## 2 Biocompatibility of Pt-BGP NCs

HeLa cells was evenly inoculated in a 96-well tissue culture plate (6000 cells/well) at  $\text{CO}_2$  concentration of 5%,  $37^\circ\text{C}$ , and 200  $\mu\text{L}$  of high glucose-sugar medium containing 10% fetal bovine serum (FBS) for 24 h. Then, the medium was changed to a high-glucose medium containing 200  $\mu\text{L}$  of different BGP and Pt-BGP NCs concentrations in the same environment for 24 h. Then the medium was changed to 100  $\mu\text{L}$  thiazole blue solution ( $C=0.5 \text{ mg/mL}$ ) for 4 h. The thiazole blue solution was substituted for 150  $\mu\text{L}$  DMSO. Finally, the absorbance was read by Spectra Max M2 at 490 nm and calculate the cell viability.

## 3 Results and discussion

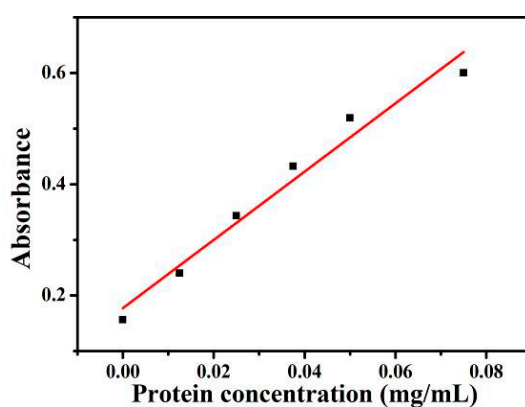

**Figure S1.** Protein content standard curve

**Table S1** Comparison of the non-cytotoxic concentration of different mimic enzymes

| Catalysts                 | Non-cytotoxic concentration ( $\mu\text{g/mL}$ ) | Reference             |
|---------------------------|--------------------------------------------------|-----------------------|
| Pt-BGP NCs                | 80                                               | This work             |
| Au-Pt/ $\text{SiO}_2$ NPs | 25                                               | (Wu et al., 2017)     |
| Pt/P NPs                  | 25                                               | (Yang et al., 2017)   |
| Au@Pt NDRs                | 20                                               | (J. Liu et al., 2015) |

## References

1. Zare, M.; Namratha, K.; Thakur, M. S.; & Byrappa, K. Biocompatibility assessment and photocatalytic activity of bio-hydrothermal synthesis of ZnO nanoparticles by *Thymus vulgaris* leaf extract. *Materials Research Bulletin*. 2019,109, 49-59.
2. Zhao, L.; Wu, Z.; Liu, G.; Lu, H.; Gao, Y.; Liu, F.; Lu, G. High-activity Mo, S co-doped carbon quantum dot nanozyme-based cascade colorimetric biosensor for sensitive detection of cholesterol. *J Mater Chem B*. 2019, 7(44), 7042-7051.
3. Zhao, X.; Wu, K.; Lyu, H.; Zhang, X.; Liu, Z.; Fan G.; Liu, Q. Porphyrin functionalized Co(OH)<sub>2</sub>/GO nanocomposites as an excellent peroxidase mimic for colorimetric biosensing. *Analyst*. 2019, 144(17), 5284-5291.
